# Supplementary material
Source: bioRxiv or medRxiv preprint supplement (https://medrxiv.org/highwire/filestream/82932/field_highwire_adjunct_files/0/2020.05.20.20107607-1.pdf)
Supplement: Supplementary file [file 2020.05.20.20107607-1.pdf]

## Supplementary Information for

### **Chansu Injection Improves the Respiratory Function of Severe COVID-19 Patients**

Fen Hu<sup>1#</sup>, Jiao Chen<sup>2#</sup>, Hao Chen<sup>2</sup>, Jin Zhu<sup>2</sup>, Chen Wang<sup>2</sup>, Haibin Ni<sup>2</sup>, Jianming Cheng<sup>2</sup>, Peng Cao<sup>2,3\*</sup>, Xingxing Hu<sup>2\*</sup>

\* Correspondence: Peng Cao, Email: cao\_peng@njucm.edu.cn;  
Xingxing Hu, Email: huxingxing82@163.com

#### **This PDF file includes:**

Tables S1 to S2

**Table S1.** Comparison of safety indicators between the treatment group and control group

|                                                      |                        | Treatment Group<br>(n=21) | Control Group<br>(n=19) | <i>P</i> Value* |
|------------------------------------------------------|------------------------|---------------------------|-------------------------|-----------------|
| <b>AST</b><br>( $\bar{x}\pm s$ , U/L)                | Day 1                  | 34.68±24.58 <sup>^</sup>  | 45.57±29.73             | 0.213           |
|                                                      | Day 7                  | 26.46±12.46               | 30.79±16.07             | 0.345           |
|                                                      | <b><i>P</i> Value*</b> | 0.179                     | 0.065                   |                 |
| <b>ALT</b><br>( $\bar{x}\pm s$ , U/L)                | Day 1                  | 39.39±34.19               | 35.90±37.55             | 0.760           |
|                                                      | Day 7                  | 37.23±23.14               | 46.58±30.55             | 0.279           |
|                                                      | <b><i>P</i> Value*</b> | 0.812                     | 0.342                   |                 |
| <b>TB</b><br>( $\bar{x}\pm s$ , U/L)                 | Day 1                  | 12.56±7.23                | 11.42±5.40              | 0.578           |
|                                                      | Day 7                  | 12.98±5.97                | 12.61±5.95              | 0.843           |
|                                                      | <b><i>P</i> Value*</b> | 0.839                     | 0.525                   |                 |
| <b>Cr</b><br>( $\bar{x}\pm s$ , mmol/L)              | Day 1                  | 59.66±14.12               | 76.54±30.31             | 0.051           |
|                                                      | Day 7                  | 55.32±20.36               | 67.97±33.12             | 0.126           |
|                                                      | <b><i>P</i> Value*</b> | 0.427                     | 0.411                   |                 |
| <b>CK-MB</b><br>( $\bar{x}\pm s$ , U/L)              | Day 1                  | 32.32±64.14               | 18.07±8.31              | 0.343           |
|                                                      | Day 7                  | 36.91±62.99               | 16.67±11.23             | 0.162           |
|                                                      | <b><i>P</i> Value*</b> | 0.816                     | 0.665                   |                 |
| <b>PLT</b><br>( $\bar{x}\pm s$ , 10 <sup>9</sup> /L) | Day 1                  | 195.52±57.75              | 174.00±48.40            | 0.212           |
|                                                      | Day 7                  | 202.52±62.26              | 201.10±95.70            | 0.921           |
|                                                      | <b><i>P</i> Value*</b> | 0.708                     | 0.298                   |                 |

\*: Statistical significance between Day 1 and Day 7 in the same group,  $P < 0.05$

\*: Statistical significance between the treatment group and control group,  $P < 0.05$

<sup>^</sup>: Plus-minus values are means  $\pm$ SD

**Table S2.** Comparison of the general treatment drugs between the treatment group and control group

|                                                | <b>Treatment Group (n=21)</b> | <b>Control Group (n=19)</b> | <b>P Value</b> |
|------------------------------------------------|-------------------------------|-----------------------------|----------------|
| <b>Major intervention drugs (n, %)</b>         |                               |                             |                |
| <b>Glucocorticoid (n, %)</b>                   |                               |                             |                |
| 0 mg/Day                                       | 3 (14.29)                     | 2 (10.53)                   | 0.720          |
| 40 mg/Day                                      | 2 (9.52)                      | 5 (26.32)                   | 0.163          |
| 80 mg/Day                                      | 15 (71.43)                    | 11 (57.89)                  | 0.370          |
| Larger doses                                   | 1 (4.76)                      | 1 (5.26)                    | 0.942          |
| <b>Antiviral drugs (n, %)</b>                  |                               |                             |                |
| Arbidol                                        | 21 (100)                      | 17 (89.47)                  | 0.127          |
| Ribavirin                                      | 16 (76.19)                    | 13 (68.42)                  | 0.583          |
| Peramivir                                      | 12 (57.14)                    | 10 (52.63)                  | 0.775          |
| IFN- $\alpha$                                  | 20 (95.24)                    | 15 (78.95)                  | 0.120          |
| <b>gamma Globulin (n,%)</b>                    |                               |                             |                |
| 0 g/Day                                        | 5 (23.81)                     | 6 (31.58)                   | 0.583          |
| 10 g/Day                                       | 16 (76.19)                    | 12 (63.16)                  | 0.369          |
| 20 g/Day                                       | 0 (0)                         | 1 (5.26)                    | 0.287          |
| <b>Initial respiratory support mode (n, %)</b> |                               |                             |                |
| Oxygen support with nasal duct                 | 8 (38.10)                     | 8 (42.11)                   | 0.796          |
| Oxygen mask                                    | 2 (9.52)                      | 3 (15.79)                   | 0.550          |
| High-flow oxygen therapy                       | 7 (33.33)                     | 4 (21.05)                   | 0.385          |
| Non-invasive ventilation                       | 4 (19.04)                     | 4 (21.05)                   | 0.874          |
